# Supplementary material for: Restoring cellular magnesium balance through Cyclin M4 protects against acetaminophen-induced liver damage
Source: Springer Nature journal article supplement (doi:10.1038/s41467-022-34262-0), 2022-11-25
Supplement: MOESM1 [file 41467_2022_34262_MOESM1_ESM.pdf]

**a**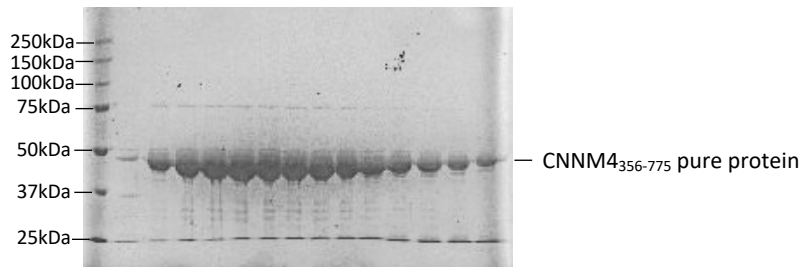**b**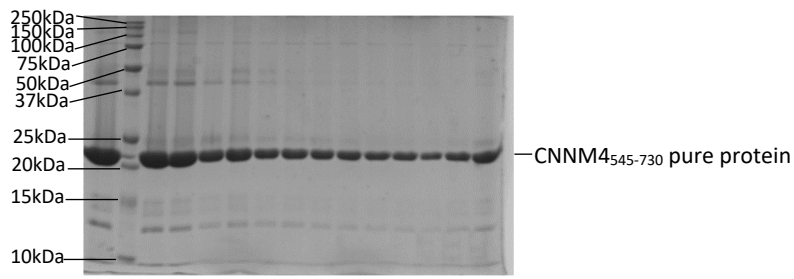

**Supplemental Figure 1. Purified protein of CNNM4<sup>BATEMAN-cNMP-Ctail</sup> and CNNM4<sup>cNMP</sup>.**

**A.** The purity of CNNM4<sup>BATEMAN-cNMP-Ctail</sup> was confirmed in a SDS-polyacrylamide gel from a gel filtration chromatography. The theoretical molecular weight of the protein was 47.86 kDa. **B.** The purity of CNNM4<sup>cNMP</sup> was confirm in a SDS-polyacrylamide gel from a gel filtration chromatography. The theoretical molecular weight of the protein was 20.94 kDa. These experiments were repeated independently three times.

**a**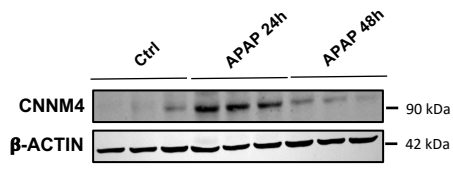**b**

### Competitive analysis for immunohistochemistry of CNNM4

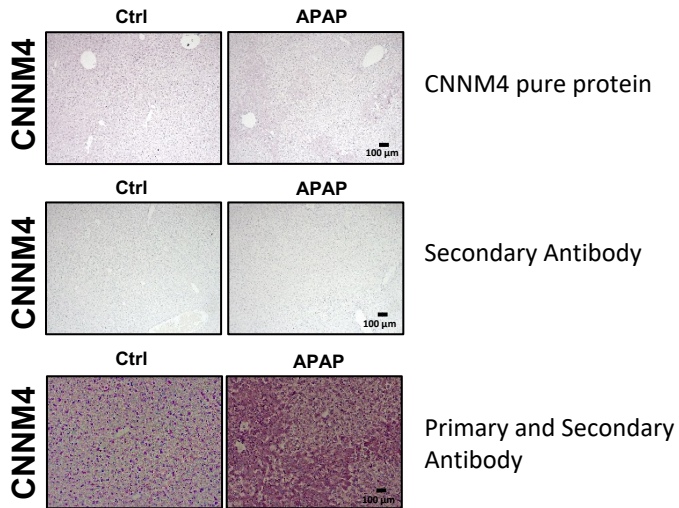

**Supplemental Figure 2. Cyclin M4 (CNNM4) is overexpressed pre-clinical animal models caused by APAP.**

**A.** Western blot analysis of CNNM4 in animals treated with a single dose of APAP 360mg/kg for 24h (n=4) and 48h (n=4) compared to a healthy group (n=4).  $\beta$ -ACTIN was used as a loading control. **B.** Competitive analysis in liver tissue of mice (n=3) for immunohistochemistry of CNNM4 in three different conditions: IHC with 0.3  $\mu$ mol/mL of CNNM4 pure protein, with only secondary antibody and with primary and secondary antibody. These experiments were repeated independently three times. Source data are provided as a Source Data file.



**a**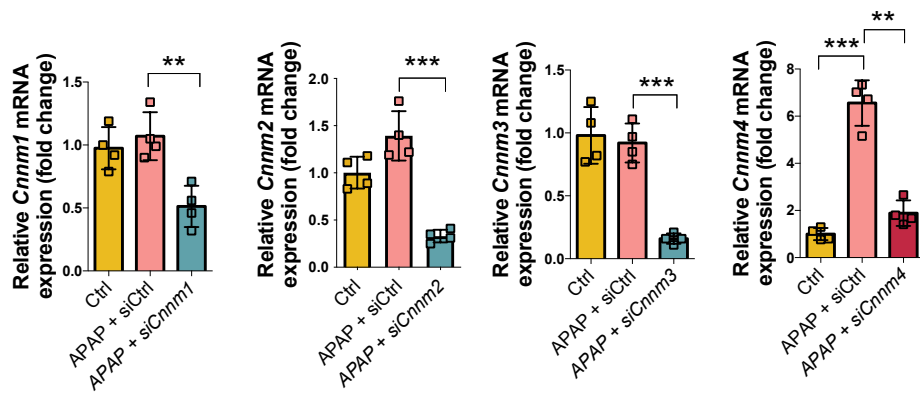**b**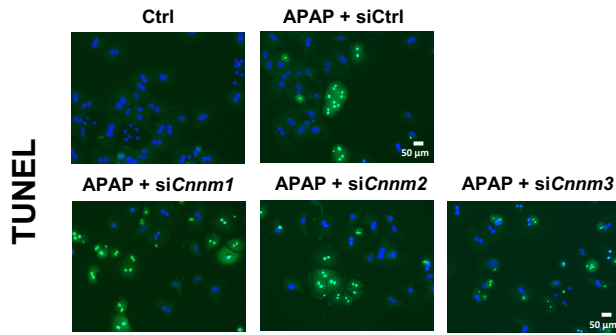**c**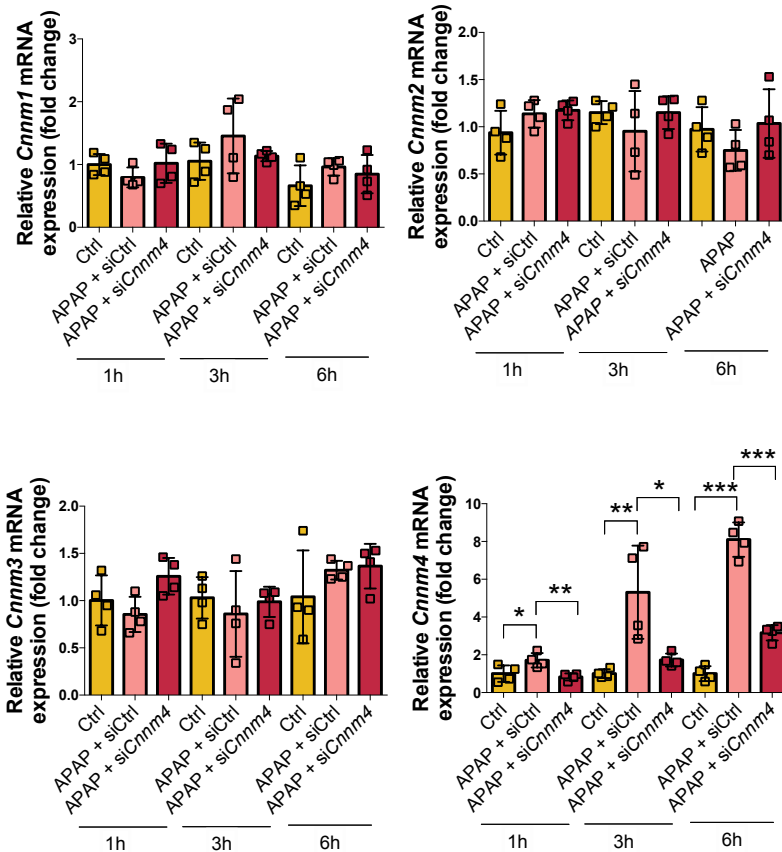**d**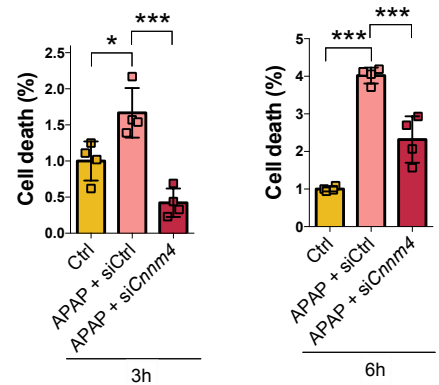

**Supplemental Figure 3. Silencing *Cnnm4* protects against cell death caused by APAP toxicity in primary hepatocytes.**

**A.** mRNA levels of *Cnnm1*, *Cnnm2*, *Cnnm3* and *Cnnm4* in WT hepatocytes under APAP overdose for 3h and treated with a siRNA *Cnnm1*, *Cnnm2*, *Cnnm3* and *Cnnm4* or an unrelated control (siCtrl) compared to a control group (Ctrl). Values are represented as mean  $\pm$  SEM.  $^{**}P < 0.01$ ;  $^{***}P < 0.001$  (*Cnnm1*  $P=0.0044$  APAP+si*Cnnm1* vs APAP) (*Cnnm2*  $P=0.00022$  APAP+si*Cnnm2* vs APAP) (*Cnnm3*  $P=7.93E-05$  APAP+si*Cnnm3* vs APAP) (*Cnnm4*  $P=3.13E-05$  APAP vs Ctrl;  $P=0.00015$  APAP+si*Cnnm4* vs APAP) (Student's test, two-sided). **B.** Cell death was evaluated using TUNEL in WT hepatocytes under APAP overdose for 3h and treated with a siRNA *Cnnm1*, *Cnnm2*, *Cnnm3* and *Cnnm4* or an unrelated control (siCtrl) compared to a control group (Ctrl). Scale bar correspond to 50  $\mu$ m **C.** mRNA levels of *Cnnm1*, *Cnnm2*, *Cnnm3* and *Cnnm4* for 1h, 3h and 6h under APAP overdose and treated with a siRNA *Cnnm4* or an unrelated control (siCtrl) compared to a control group (Ctrl). Values are represented as mean. Values are represented as mean  $\pm$  SEM.  $^{*}P < 0.05$ ;  $^{**}P < 0.01$ ;  $^{***}P < 0.001$  (1h  $P=0.05$  APAP vs Ctrl;  $P=0.006$  APAP+si*Cnnm4* vs APAP) (3h  $P=0.01$  APAP vs Ctrl;  $P=0.028$  APAP+si*Cnnm4* vs APAP) (6h  $P=7.38E-06$  APAP vs Ctrl;  $P=6.22E-05$  APAP+si*Cnnm4* vs APAP) (Student's test, two-sided). **D.** Cell death was evaluated using Trypan Blue in WT hepatocytes under APAP overdose for 3h and 6h and treated with a siRNA *Cnnm4* or an unrelated control (siCtrl) compared to a control group (Ctrl). Quadrupled were used for experimental conditions. Values are represented as mean  $\pm$  SEM.  $^{*}P < 0.05$ ,  $^{**}P < 0.01$ ,  $^{***}P < 0.001$  (3h  $P=0.022$  APAP vs Ctrl;  $P=0.00076$  APAP+si*Cnnm4* vs APAP) (6h  $P=1.66E-07$  APAP vs Ctrl;  $P=0.001$  APAP+si*Cnnm4* vs APAP) (Student's test, two-sided). Source data are provided as a Source Data file.

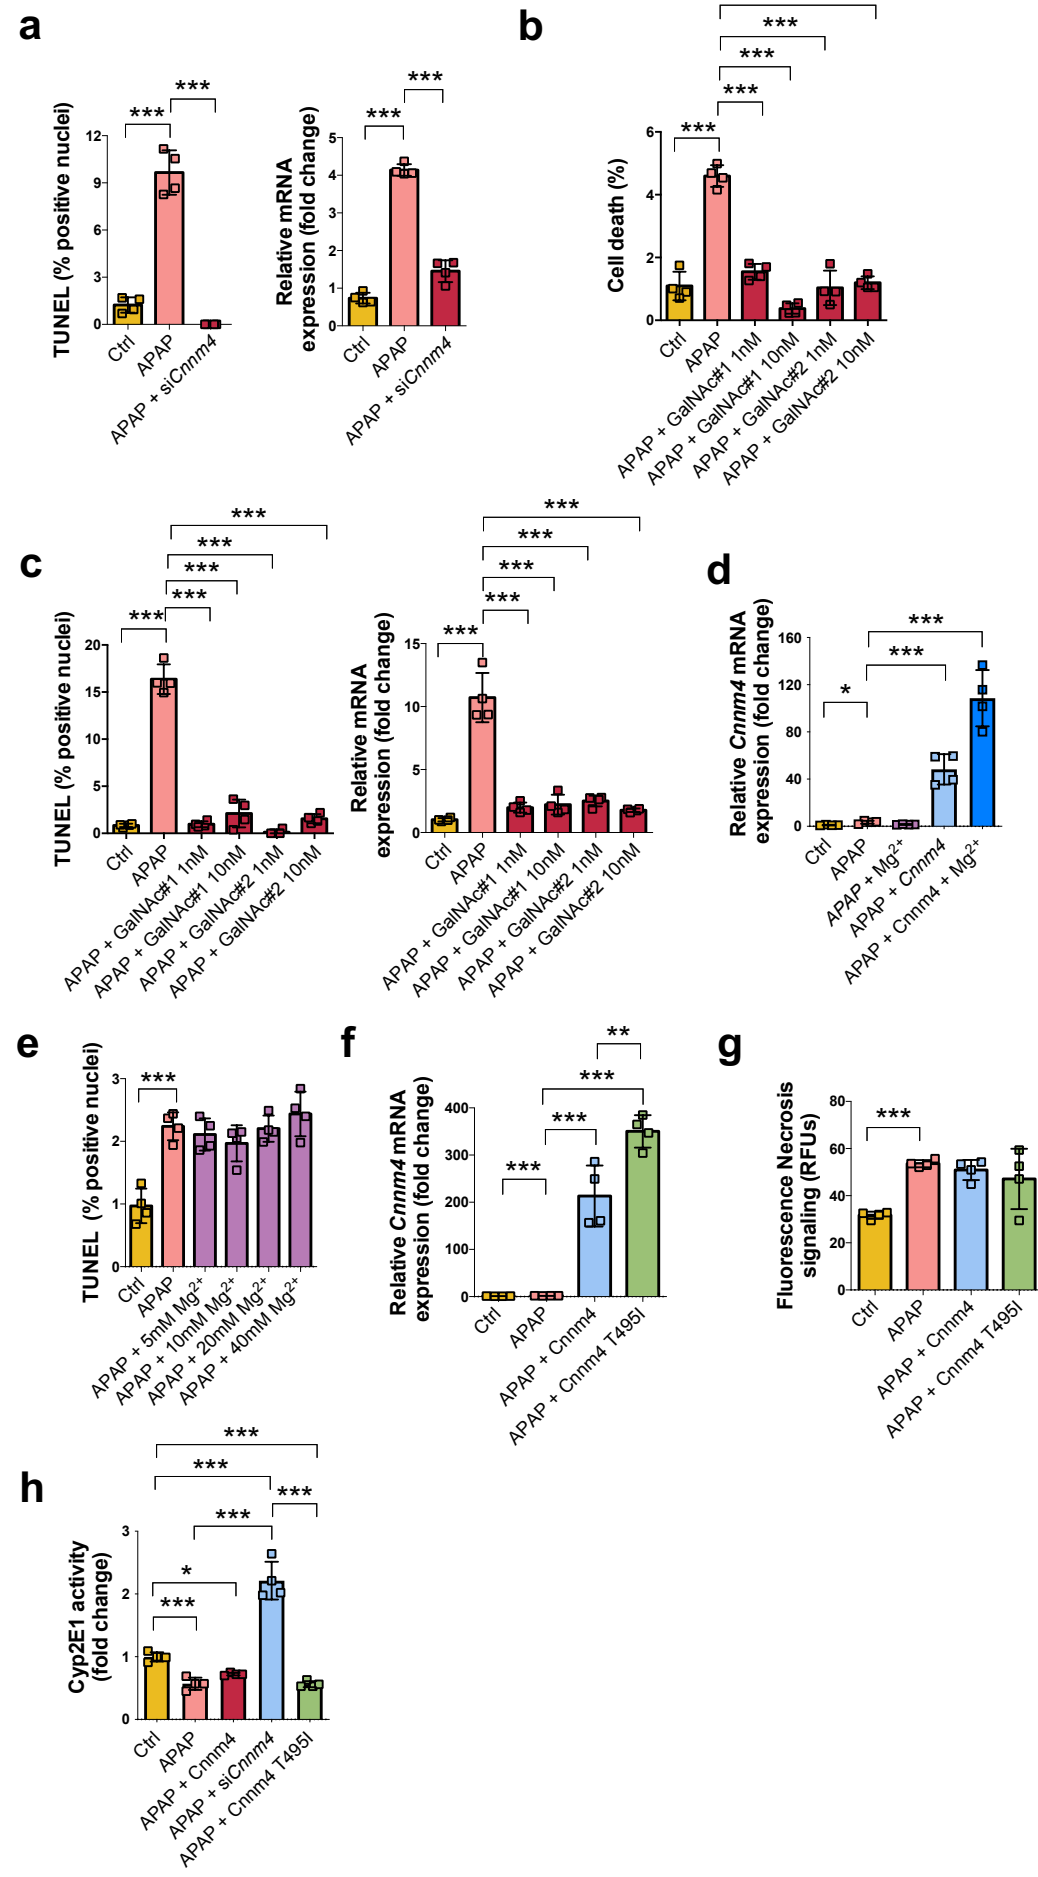

#### Supplemental Figure 4. $Mg^{2+}$ supplementation failed to solve APAP-mediated toxicity

**A.** Cell death was evaluated using TUNEL in THLE2 cell line under APAP overdose for 6h and treated with a siRNA *Cnnm4* or an unrelated control (siCtrl) compared to a control group (Ctrl). Values are represented as mean  $\pm$  SEM. \*\*\* $P < 0.001$  (TUNEL  $P=2.87E-05$  APAP vs Ctrl;  $P=9.37E-06$  APAP+si*Cnnm4* vs APAP) (mRNA  $P=5.72E-08$  APAP vs Ctrl;  $P=3.28E-06$  APAP+si*Cnnm4* vs APAP) (Student's test, two-sided). **B.** Cell death was evaluated using Trypan Blue in WT hepatocytes under APAP overdose for 6h and treated with two GalNAc siRNA *Cnnm4* (GalNAc#1 and GalNAc#2) molecules at different concentrations 1nM and 10nM compared to a control group (Ctrl). Values are represented as mean  $\pm$  SEM. \*\*\* $P < 0.001$  ( $P=1.79E-05$  APAP vs Ctrl;  $P=7.41E-06$  APAP+GalNAc#1 1nM vs APAP;  $P=5.63E-07$  APAP+GalNAc#1 10nM vs APAP;  $P=3.35E-05$  APAP+GalNAc#2 1nM vs APAP;  $P=2.66E-06$  APAP+GalNAc#2 10nM vs APAP) (Student's test, two-sided). **C.** Cell death was evaluated using TUNEL in WT hepatocytes under APAP overdose for 6h and with two GalNAc siRNA *Cnnm4* (GalNAc#1 and GalNAc#2) molecules at different concentrations 1nM and 10nM compared to a control group (Ctrl). Values are represented as mean  $\pm$  SEM. \*\*\* $P < 0.001$  (TUNEL  $P=1.15E-06$  APAP vs Ctrl;  $P=1.31E-06$  APAP+GalNAc#1 1nM vs APAP;  $P=1.16E-05$  APAP+GalNAc#1 10nM vs APAP;  $P=9.28E-07$  APAP+GalNAc#2 1nM vs APAP;  $P=1.92E-06$  APAP+GalNAc#2 10nM vs APAP) (mRNA  $P=6.14E-05$  APAP vs Ctrl;  $P=0.00012$  APAP+GalNAc#1 1nM vs APAP;  $P=0.00019$  APAP+GalNAc#1 10nM vs APAP;  $P=0.00018$  APAP+GalNAc#2 1nM vs APAP;  $P=9.71E-05$  APAP+GalNAc#2 10nM vs APAP) (Student's test, two-sided). **D.** mRNA *Cnnm4* expression levels in WT hepatocytes under APAP overdose for 3h with and without 5mM of  $Mg^{2+}$ , overexpressing CNNM4 and overexpressing CNNM4 with  $Mg^{2+}$  compared to a control group (Ctrl). Values are represented as mean  $\pm$  SEM. \*\* $P < 0.01$ ; \*\*\* $P < 0.001$  ( $P=0.0084$  APAP vs Ctrl;  $P=0.00043$  APAP+*Cnnm4* vs APAP;  $P=0.00012$  APAP+*Cnnm4*+ $Mg^{2+}$  vs APAP) (Student's test, two-sided). **E.** Cell death was evaluated using TUNEL in WT primary hepatocytes under APAP overdose for 3h and supplemented with 5mM, 10mM, 20mM and 40mM  $Mg^{2+}$ . Values are represented as mean  $\pm$  SEM. \*\*\* $P < 0.001$  ( $P=0.00037$  APAP vs Ctrl) (Student's test, two-sided). **F.** mRNA *Cnnm4* expression levels in WT primary hepatocytes under APAP overdose and overexpression *Cnnm4* and *Cnnm4* T495I. Values are represented as mean  $\pm$  SEM. \*\*\* $P < 0.001$  ( $P=0.0007$  APAP vs Ctrl;  $P=0.00061$  APAP+*Cnnm4* vs APAP;  $P=9.24E-07$  APAP+*Cnnm4* T495I vs APAP;  $P=0.0096$ ) (Student's test, two-sided). **G.** Cell death was evaluated using Annexin V Apoptosis and necrosis assay in WT hepatocytes under APAP overdose for overexpressing *Cnnm4* and overexpressing the mutant *Cnnm4* T495I and compared to a control group (Ctrl). Values are represented as mean  $\pm$  SEM. \*\*\* $P < 0.001$  ( $P=9.49E-07$  APAP vs Ctrl) (Student's test, two-sided). **H.** Cyp2e1 activity was evaluated in WT primary hepatocytes under APAP overdose for 3h and treated with si*Cnnm4* RNA, *Cnnm4* and *Cnnm4* T495I overexpression. Quadrupled were used for experimental conditions. Values are represented as mean  $\pm$  SEM. \*\* $P < 0.01$ ; \*\*\* $P < 0.001$  ( $P=0.00043$  APAP vs Ctrl;  $P=0.02$  APAP+*Cnnm4* vs APAP;  $P=4.78E-05$  APAP+si*Cnnm4* vs APAP) (Student's test, two-sided). Source data are provided as a Source Data file.

**a**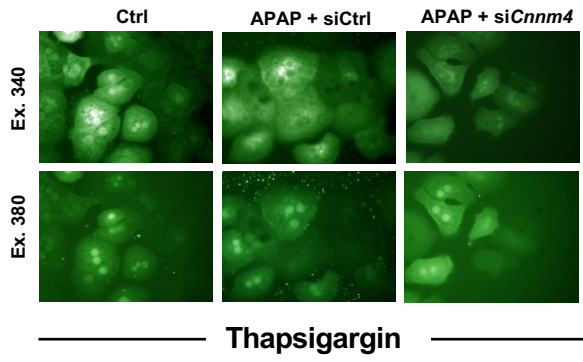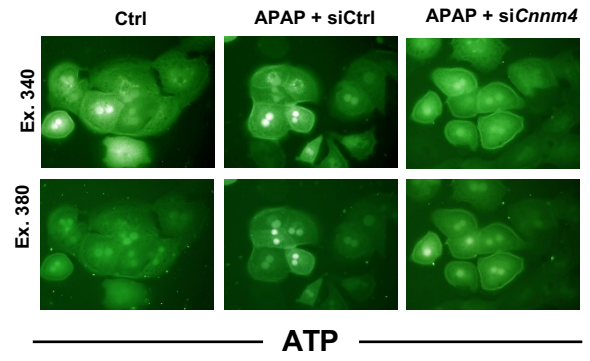**b**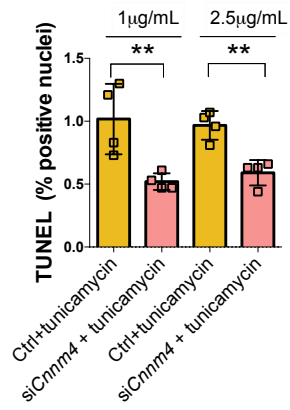

**Supplemental Figure 5. Silencing *Cnnm4* in hepatocytes reduces endoplasmic reticulum stress**

**A.** Calcium ( $\text{Ca}^{2+}$ ) release capacity by ER with thapsigargin and ATP upon time under APAP overdose for 3h treated with a siRNA *Cnnm4* or an unrelated control (siCtrl) compared to a healthy group (Ctrl). **B.** Cell death was evaluated using TUNEL assay in WT primary hepatocytes treated with two different doses of tunicamycin (1 $\mu\text{g}/\text{mL}$  and 2.5 $\mu\text{g}/\text{mL}$ ) with si*Cnnm4* (n=4) or an unrelated control (n=4). Values are represented as mean  $\pm$  SEM. \*\* $P < 0.01$  ( $P=0.013$  si*Cnnm4*+1 $\mu\text{g}/\text{mL}$  tunicamycin vs Ctrl 1 $\mu\text{g}/\text{mL}$  tunicamycin;  $P=0.0026$  si*Cnnm4*+2.5 $\mu\text{g}/\text{mL}$  tunicamycin vs Ctrl) (Student's test, two-sided). Source data are provided as a Source Data file.

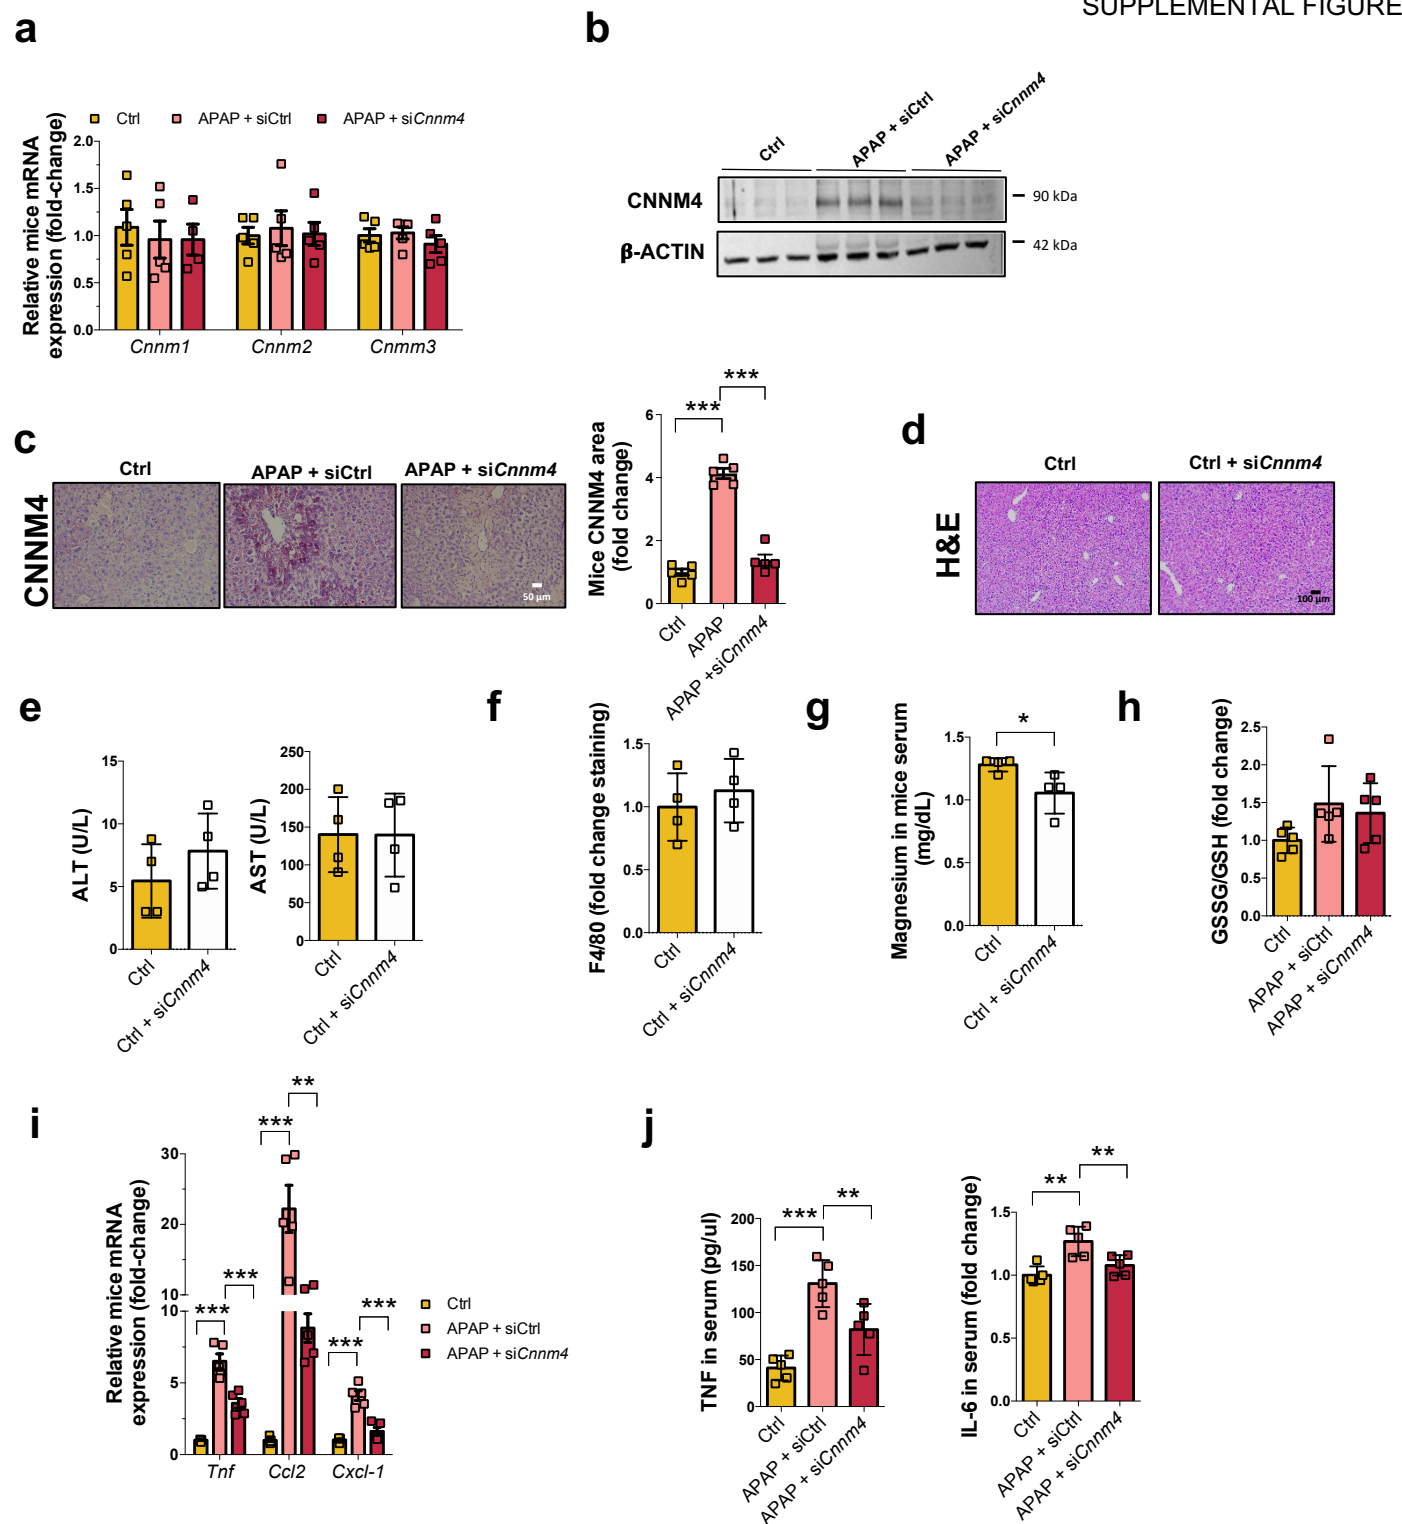

**Supplemental Figure 6. Silencing *Cnnm4* prevents APAP hepatotoxicity in *in vivo* models.**

**A-K.** WT mice were treated with APAP 360 mg/kg by intraperitoneal injection 48 h and in the last 24h siRNA *Cnnm4* (n=5) or an unrelated control (siCtrl) (n=5) were injected via tail vein and compared to control group (n=5). **A.** mRNA levels of *Cnnm1*, *Cnnm2* and *Cnnm3*. **B.** Western Blot analysis of CNNM4,  $\beta$ -ACTIN was used as a loading control. **C.** Liver immunohistochemical staining and respective quantification of CNNM4 was determined in the experimental groups of APAP 360mg/kg for 48h (n=5) and silenced si*Cnnm4* or unrelated control animal models compared to a healthy group (n=5). Scale bar correspond to 50  $\mu$ m. Values are represented as mean  $\pm$  SEM. \*\*\* $P$  < 0.001 ( $P$ =1.87E-07 APAP vs Ctrl;  $P$ =2.92E-06 APAP+si*Cnnm4*) (Student's test, two-sided). **D-G.** WT mice were treated with siRNA *Cnnm4* (n=4) via tail vein injection and compared to control group (n=4). Mice were sacrificed 24h after. **D.** Liver necrosis was assessed by H&E staining. Scale bar correspond to 100  $\mu$ m. **E.** Transaminases ALT and AST levels were determined in mice serum. **F.** Inflammation assessed by F4/80 staining in liver. **G.** Magnesium levels were determined in mice serum. Values are represented as mean  $\pm$  SEM. \* $P$  < 0.05 ( $P$ =0.046 Ctrl+si*Cnnm4* vs Ctrl) (Student's test, two-sided). **H.** GSSG/GSH levels measured by HPLC-MS. **I.** mRNA levels of *Tnf*, *Ccl2* and *Cxcl-1*. Values are represented as mean  $\pm$  SEM. \* $P$  < 0.05; \*\* $P$  < 0.01; \*\*\* $P$  < 0.001 (*Tnf*  $P$ =4.99E-06 APAP vs Ctrl;  $P$ = 0.0014 APAP+si*Cnnm4* vs APAP) (*Ccl2*  $P$ =0.00022 APAP vs Ctrl;  $P$ =0.005 APAP+si*Cnnm4* vs APAP) (*Cxcl-1*  $P$ =1.64E-05 APAP vs Ctrl;  $P$ =0.00036 APAP+si*Cnnm4* vs APAP) (Student's test, two-sided). **J.** TNF and IL-6 levels were measured using ELISA assay in mice serum after 48h of APAP overdose. Values are represented as mean  $\pm$  SEM. \* $P$  < 0.05, \*\* $P$  < 0.01, \*\*\* $P$  < 0.001 (*TNF*  $P$ =0.0001 APAP vs Ctrl;  $P$ =0.01 APAP+si*Cnnm4* vs APAP) (*IL6*  $P$ =0.0024 APAP vs Ctrl;  $P$ =0.017 APAP+si*Cnnm4* vs APAP) (Student's test, two-sided). Source data are provided as a Source Data file.



**a**

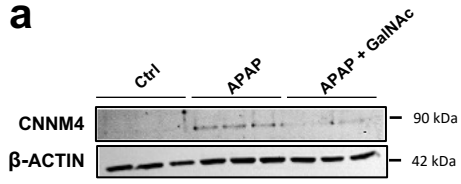

**b**

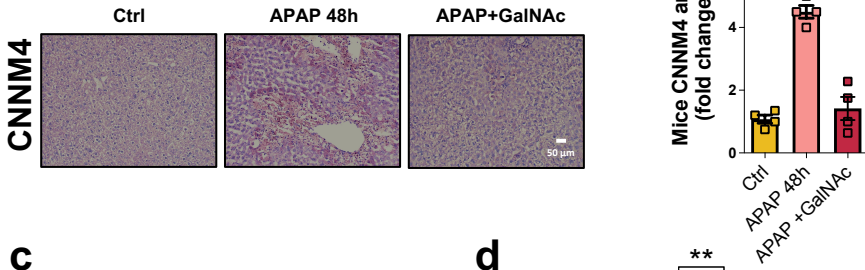

**c**

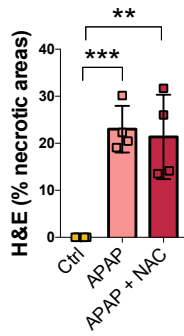

**d**

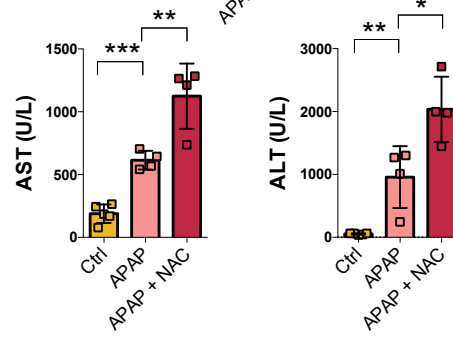

### Supplemental Figure 7. NAC is not a therapeutical option after 24 hours of APAP overdose

A-B. WT mice were treated with APAP 360 mg/kg by intraperitoneal injection 48 h and in the last 24h 3mg/kg GalNAc *Cnnm4* siRNA (n=4) or an unrelated control (n=4) were injected subcutaneously. Mice were sacrificed 48h after APAP overdose. **A.** Western Blot analysis of CNNM4,  $\beta$ -ACTIN was used as a loading control. **B.** Liver immunohistochemical staining and respective quantification of CNNM4 was determined in the experimental groups of APAP 360mg/kg for 48h (n=4) and silenced with GalNAc si*Cnnm4* or unrelated control (n=4) animal models compared to a healthy group (n=4). Scale bar correspond to 50  $\mu$ m. Values are represented as mean  $\pm$  SEM. \*\*\* $P < 0.001$  ( $P=7.76E-06$  APAP vs Ctrl;  $P=0.00033$  APAP+si*Cnnm4* vs APAP) (Student's test, two-sided). **C-D.** WT mice were treated with APAP 360 mg/kg by intraperitoneal injection (n=4) and in the last 24h mice received 1200mg/kg of NAC (n=4) by intraperitoneal injection and compared to control group. **C.** Liver necrosis was assessed by H&E staining. Values are represented as mean  $\pm$  SEM. \*\* $P < 0.01$ ; \*\*\* $P < 0.001$  ( $P=8.84E-05$  APAP vs Ctrl;  $P=0.0031$  APAP+NAC vs Ctrl) (Student's test, two-sided). **D.** Transaminases ALT and AST levels were determined in mice serum. Values are represented as mean  $\pm$  SEM. \* $P < 0.05$ , \*\* $P < 0.01$ , \*\*\* $P < 0.001$  (AST  $P=9.54E-05$  APAP vs Ctrl;  $P= 0.0092$  APAP+si*Cnnm4* vs APAP) (ALT  $P=0.01$  APAP vs Ctrl;  $P= 0.024$  APAP+si*Cnnm4* vs APAP) (Student's test, two-sided). Source data are provided as a Source Data file.

**a**

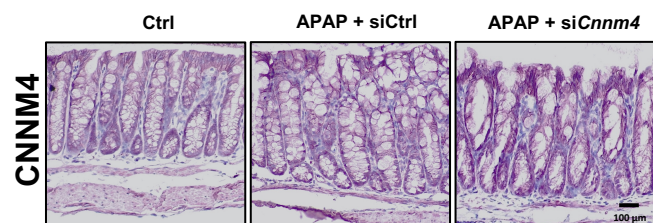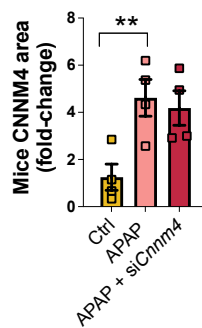

**b**

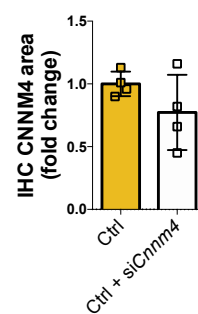

**c**

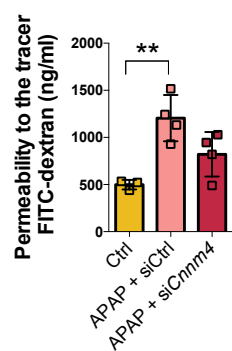

**d**

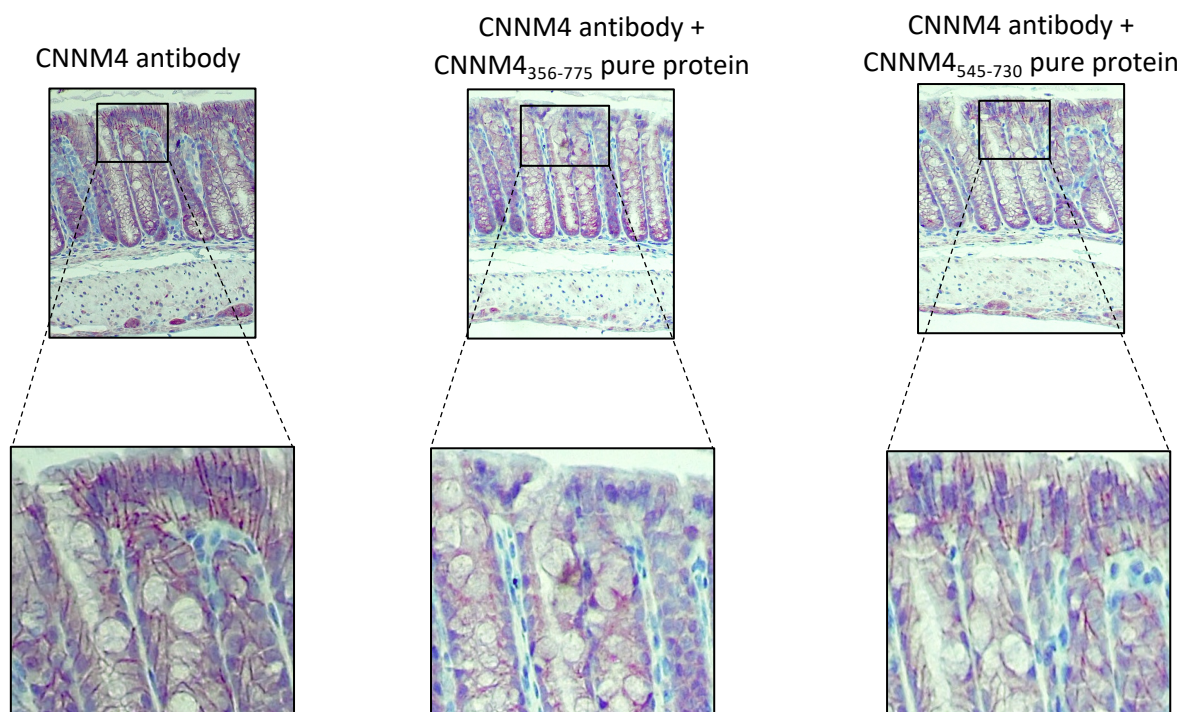

**Supplemental Figure 8. Silencing *Cnnm4* specifically in the liver does not produce any negative effects on the intestinal barrier function.**

**A.** Intestine immunohistochemical staining and respective quantification of CNNM4 was determined in WT mice under APAP overdose (n=5) compared to a healthy animal group (n=5). Scale bar correspond to 100  $\mu$ m. Values are represented as mean  $\pm$  SEM.  $**P < 0.01$  ( $P=0.01$  APAP vs Ctrl) (Student's test, two-sided). **B.** Immunohistochemical staining of the intestine and respective quantification of CNNM4 was determined in animals receiving siRNA *Cnnm4* (n=4) and compared to a control group (n=4). **C.** Dextran quantification were determined in mice serum (n=4). Values are represented as mean  $\pm$  SEM.  $**P < 0.01$  ( $P=0.005$  APAP vs Ctrl) (Student's test, two-sided). **D.** Competitive analysis for immunohistochemistry of CNNM4 in three different conditions: IHC with 0.3  $\mu$ mol/mL of CNNM4 pure protein, with only secondary antibody and with primary and secondary antibody. Source data are provided as a Source Data file.

a

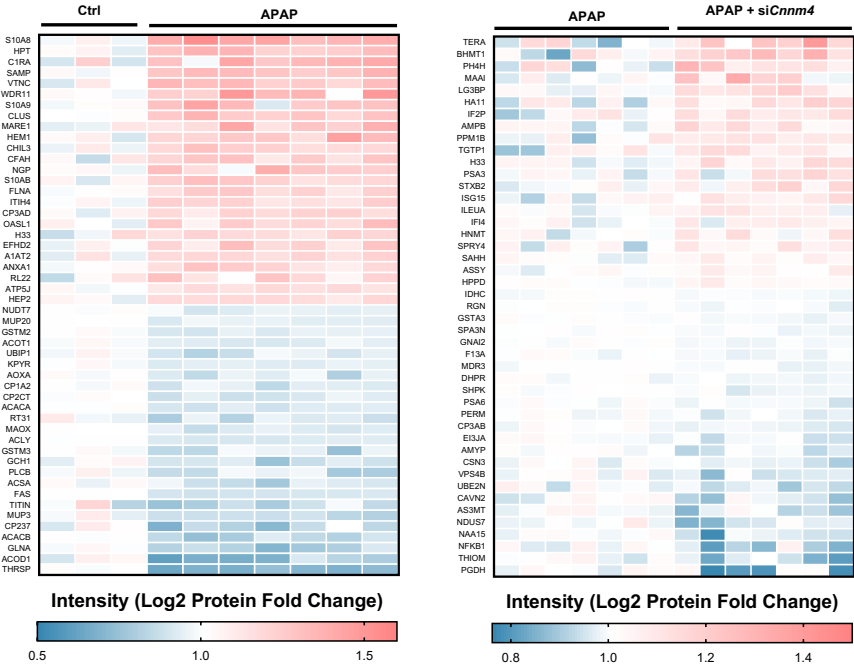

### **Supplemental Figure 9. Proteomic analysis in the liver of preclinical animal models**

**A.** Proteomics analysis by LC-MS/MS was assessed in the liver of WT mice treated with 360mg/kg APAP for 48 hours and in the last 24h mice were injected with siRNA *Cnnm4* (n=7) or an unrelated control (siCtrl) (n=7). The list of the top-50 up- and down-regulated specific proteins regulated by the absence of *Cnnm4* were analyzed. Source data are provided as a Source Data file.

**a**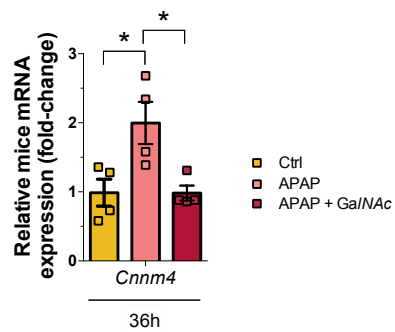**b**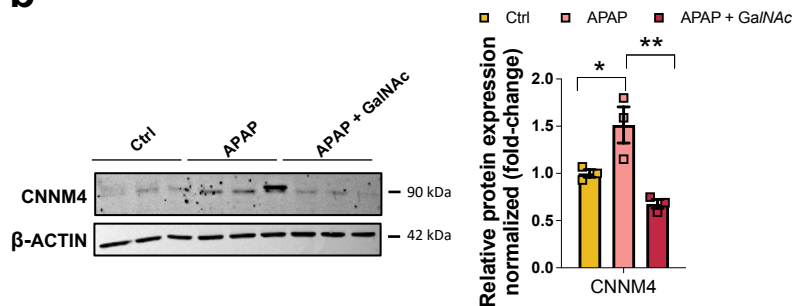**c**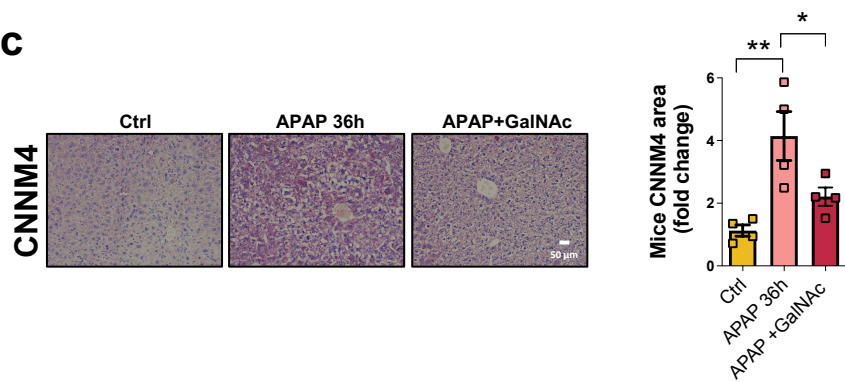**d**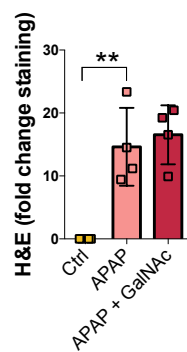**e**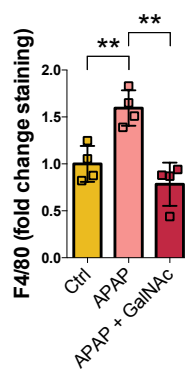

**Supplemental Figure 10. Silencing *Cnnm4* prevents APAP hepatotoxicity in *in vivo* models after 36 hours of APAP overdose.**

**A-E.** WT mice were treated with APAP 360 mg/kg by intraperitoneal injection for 36 hours (n=4) and in the last 12h 3mg/kg GalNAc *Cnnm4* siRNA (n=4) or an unrelated control (n=4) were injected subcutaneously. **A.** mRNA levels of *Cnnm4*. Values are represented as mean  $\pm$  SEM. \* $P < 0.05$  ( $P=0.032$  APAP vs Ctrl;  $P=0.02$  APAP+GalNAc vs APAP) (Student's test, two-sided). **B.** Western blot analysis of CNNM4,  $\beta$ -ACTIN was used as a loading control. Values are represented as mean  $\pm$  SEM. \* $P < 0.05$ ; \*\* $P < 0.01$  ( $P=0.059$  APAP vs Ctrl;  $P=0.01$  APAP+GalNAc vs APAP) (Student's test, two-sided). **C.** Liver immunohistochemical staining and respective quantification of CNNM4 was determined in the experimental groups of APAP 360mg/kg for 36h (n=4) and silenced with GalNAc si*Cnnm4* or unrelated control (n=4) animal models compared to a healthy group (n=4). Scale bar correspond to 50  $\mu$ m. Values are represented as mean  $\pm$  SEM. \* $P < 0.05$ ; \*\* $P < 0.01$  ( $P=0.0092$  APAP vs Ctrl;  $P=0.05$  APAP+GalNAc vs APAP) (Student's test, two-sided). **D.** Liver necrosis was assessed by H&E staining. Values are represented as mean  $\pm$  SEM. \* $P < 0.05$ ; \*\* $P < 0.01$  ( $P=0.0032$  APAP vs Ctrl) (Student's test, two-sided). **E.** Inflammation assessed by F4/80 staining in liver. Values are represented as mean  $\pm$  SEM. \*\* $P < 0.01$  ( $P=0.0046$  APAP vs Ctrl;  $P=0.0016$  APAP+GalNAc vs APAP) (Student's test, two-sided). Source data are provided as a Source Data file.



Uncropped blots for Figure 4b

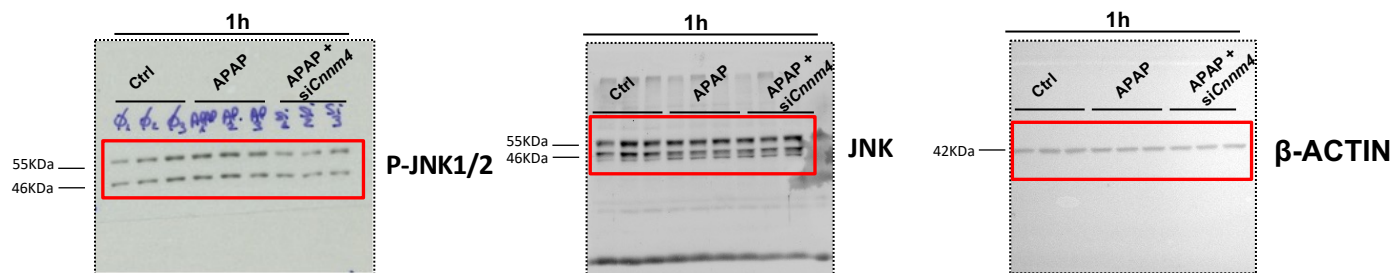

Uncropped blots for Figure 6d

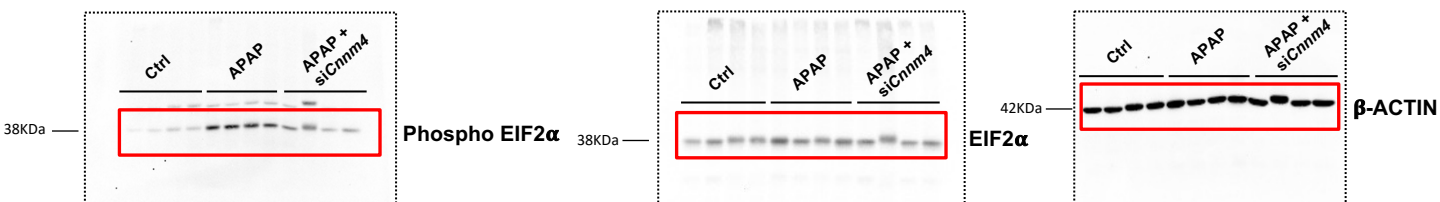

Uncropped blots for Figure 6f

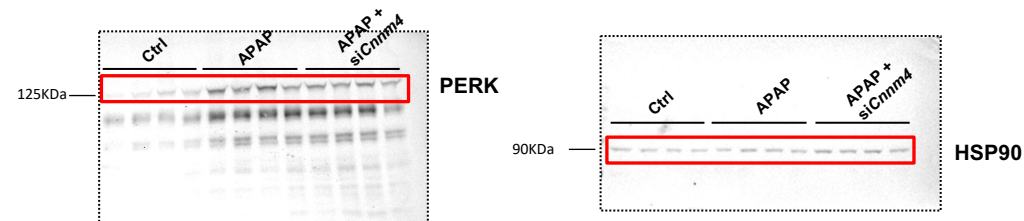

Uncropped blots for Figure 6g

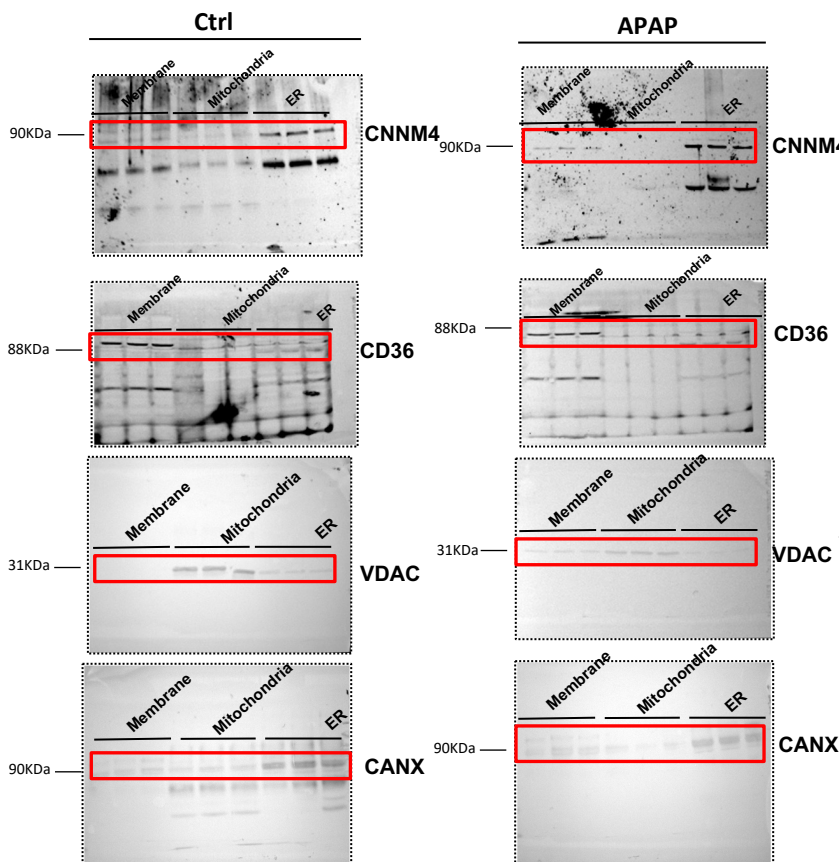

Uncropped blots for Figure 7f

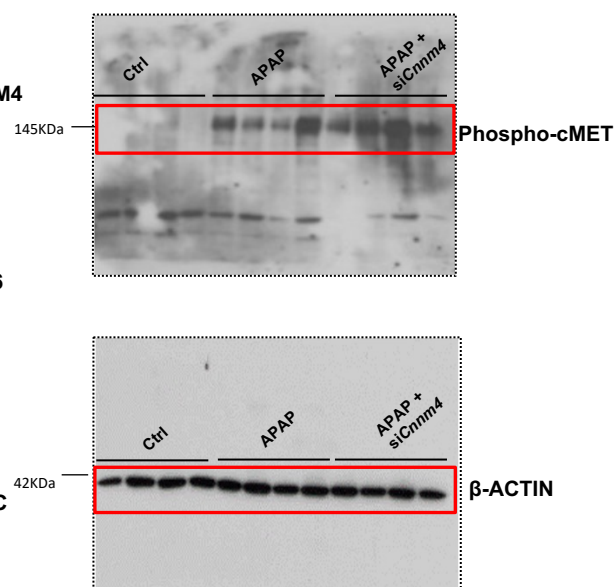

**Supplemental Figure 11. Uncropped blots for figures**

Uncropped blots for main figures

Uncropped blots for Supp. Figure 2a

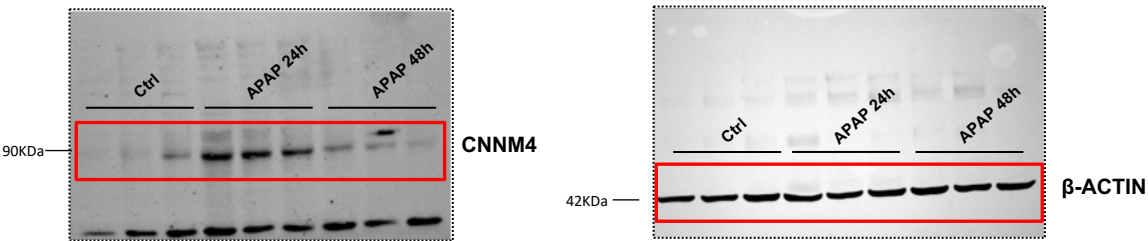

Uncropped blots for Supp. Figure 6b

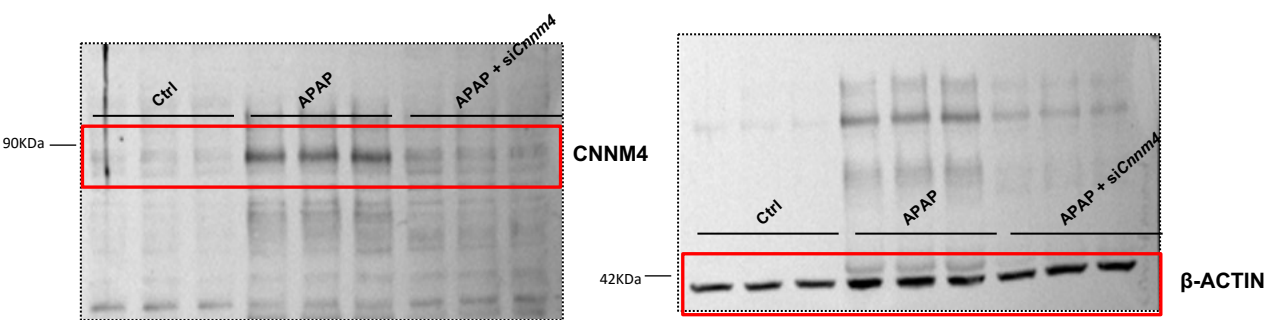

Uncropped blots for Supp. Figure 7a

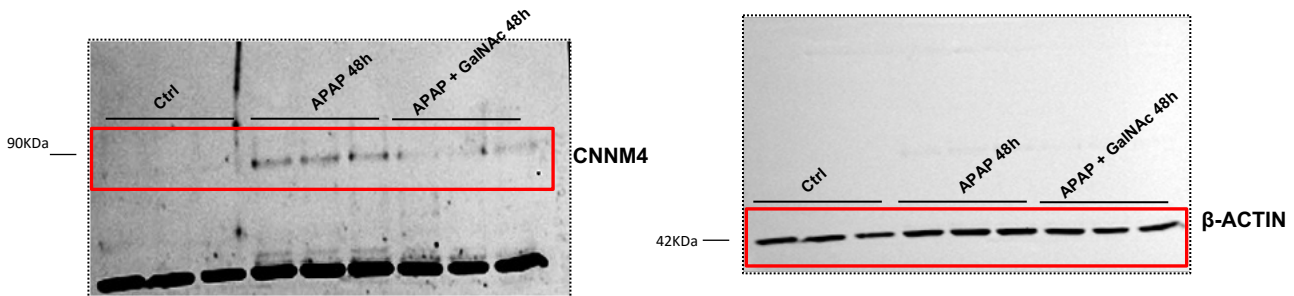

Uncropped blots for Supp. Figure 10b

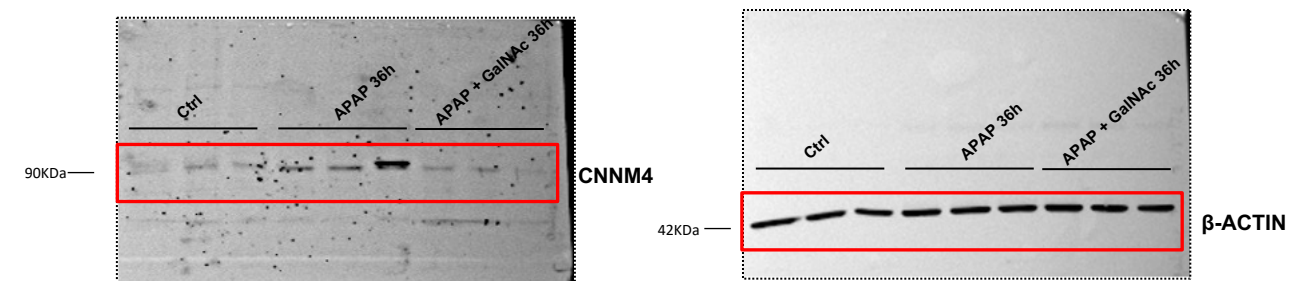

**Supplemental Figure 12. Uncropped blots for Supplementary Figures**

Uncropped blots for supplementary figures

**Supplemental Table I. Characteristics of ALLI patients**

|                                                              | <b>All patients</b> |
|--------------------------------------------------------------|---------------------|
| <i>n</i>                                                     | 24                  |
| Age (years)                                                  | 35 ± 10.4           |
| Gender (F/M)                                                 | 13/11               |
| Time from ingestion of APAP to hospital presentation (hours) | 6.37 ± 6.2          |
| Presentation APAP concentration (mg/L)                       | 101 ± 65.5          |
| Total APAP ingested (mg/kg)                                  | 261.5 ± 195.25      |
| Serum creatinine (μmol/L)                                    | 69.75 ± 13.65       |
| Any other drugs ingested                                     |                     |
| Yes                                                          | 19                  |
| No                                                           | 5                   |
| Severity, <i>n</i> (%)                                       |                     |
| Acute ≤ 8 hours                                              | 58.5%               |
| Acute > 8 hours                                              | 33.25               |
| Staggered international                                      | 17%                 |
| Supra-therapeutic                                            | 17%                 |

Data are expressed as mean ± SD

**Supplemental Table II. Characteristics of ALLI patients**

|                            | All patients |
|----------------------------|--------------|
| <i>n</i>                   | 13           |
| Age (years)                | 36 ± 13      |
| ALT (U/L)                  | 2829 ± 2501  |
| ALP (U/L)                  | 144 ± 60     |
| GGT (U/L)                  | 170 ± 119    |
| TBIL (U/L)                 | 141 ± 83     |
| Interval to explant (days) | 3 ± 1.4      |
| Severity, <i>n</i> (%)     |              |
| Mild                       |              |
| Moderate                   |              |
| Severe                     | 13 (100%)    |
| Fatal                      |              |

AST aspartate aminotransferase, ALT alanine aminotransferase, ALP alkaline phosphatase, GGT Gamma glutamyl transferase, TBL total bilirubin. Data are expressed as mean ± SD

**Supplemental Table III. Incubation conditions, Concentration, Reference and Supplier for specific antibodies analyzed by Western Blotting.**

| <b>Antibody</b>                    | <b>Supplier</b> | <b>Catalogue</b> | <b>Dilution</b> | <b>Incubation solution</b> |
|------------------------------------|-----------------|------------------|-----------------|----------------------------|
| Phospho-JNK1/JNK2 (Thr183, Tyr185) | ThermoFisher    | 44-682G          | 1:1000          | TBS-Tween (0.1%)-milk (5%) |
| SAPK/JNK                           | Cell Signaling  | 9252S            | 1:1000          | TBS-Tween (0.1%)-milk (5%) |
| Phospho EIF2 $\alpha$              | Cell Signaling  | 9721S            | 1:1000          | TBS-Tween (0.1%)-BSA (5%)  |
| EIF2 $\alpha$                      | Cell Signaling  | 5324S            | 1:1000          | TBS-Tween (0.1%)-milk (5%) |
| $\beta$ -Actin                     | Sigma           | A2228            | 1:1000          | TBS-Tween (0.1%)-milk (5%) |
| CD36                               | Scbt            | Sc-9154          | 1:1000          | TBS-Tween (0.1%)-milk (5%) |
| VDAC                               | Abcam           | AB15895          | 1:1000          | TBS-Tween (0.1%)-milk (5%) |
| CNNM4                              | Abcam           | AB191207         | 1:1000          | TBS-Tween (0.1%)-milk (5%) |
| CNX                                | Scbt            | Sc-23954         | 1:1000          | TBS-Tween (0.1%)-milk (5%) |
| HSP90                              | BD Biosciences  | 610418           | 1:1000          | TBS-Tween (0.1%)-milk (5%) |
| PERK                               | Cell Signaling  | C33E10           | 1:1000          | TBS-Tween (0.1%)-milk (5%) |
| PHOSPHO-cMET                       | Sigma           | 07-810           | 1:1000          | TBS-Tween (0.1%)-BSA (5%)  |
